# Supplementary material
Source: PubMed Central journal article supplement (PMC4750591)

Supplemental data on gating strategy for:

Rhesus 1

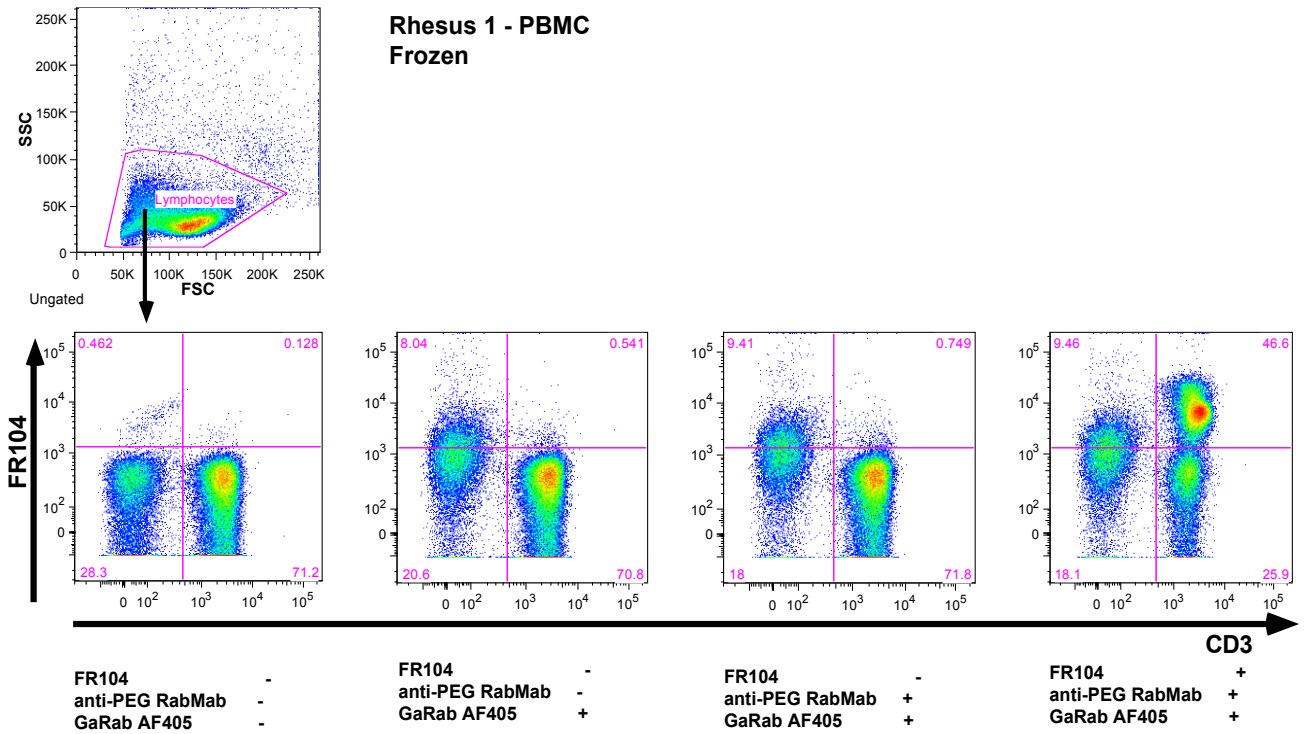

Rhesus 2

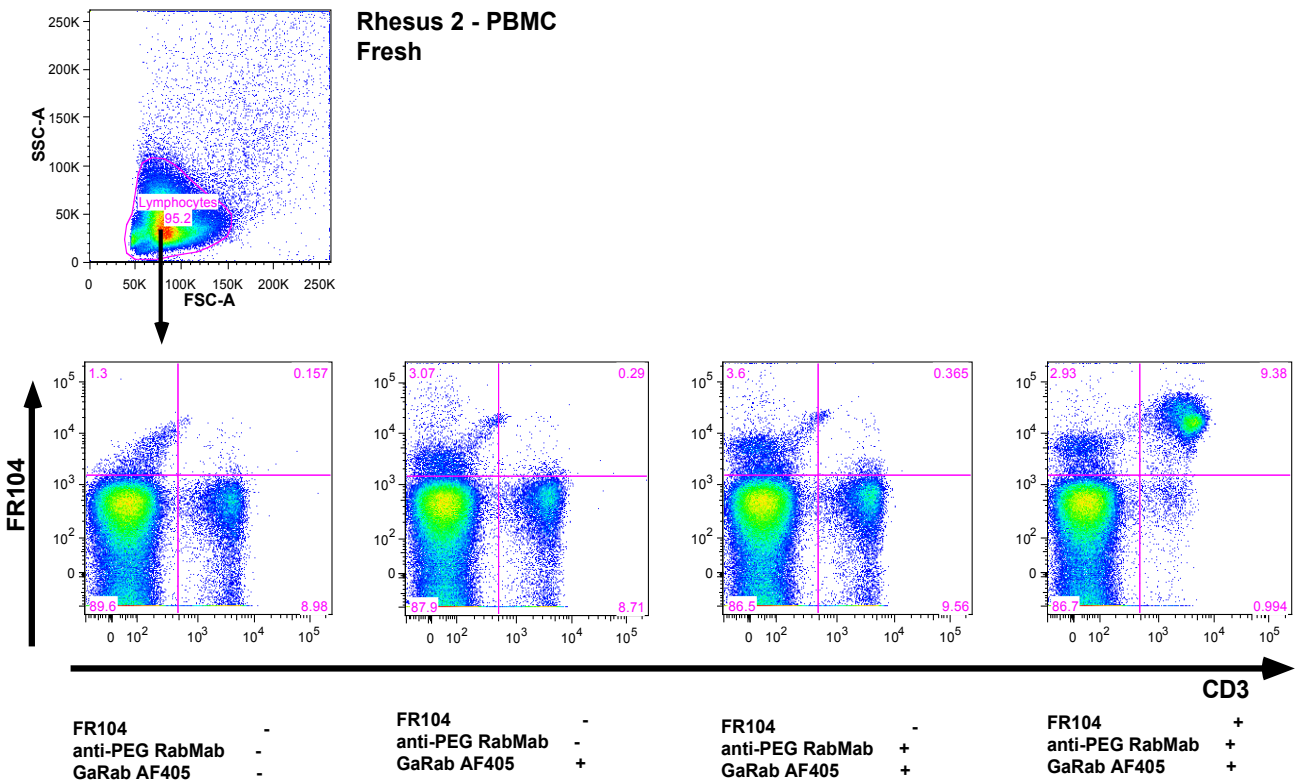

Supplement: CEI-183-405-s001.pdf [file CEI-183-405-s001.pdf]

Stimulation Index

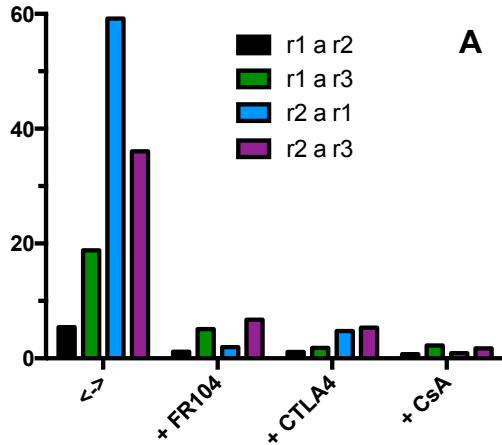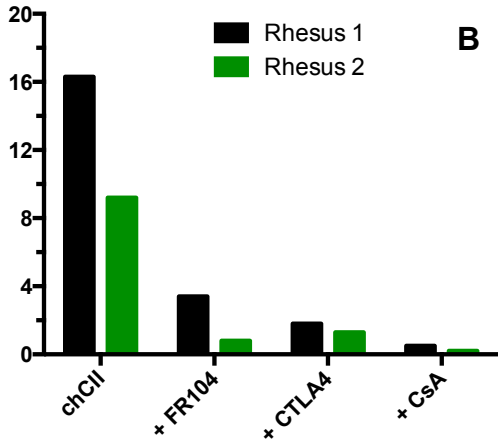

Condition

Supplement: CEI-183-405-s002.pdf [file CEI-183-405-s002.pdf]

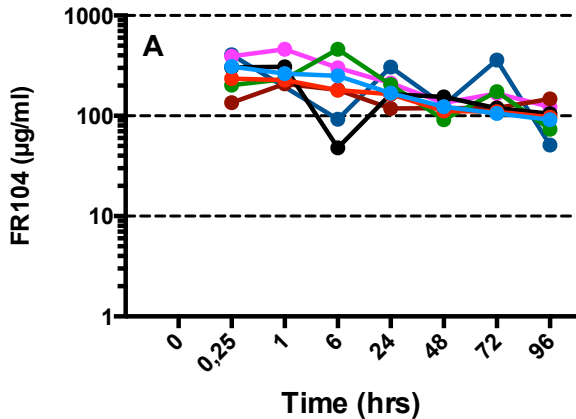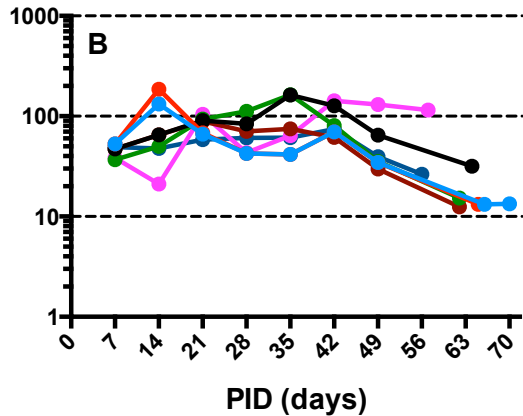

Supplement: CEI-183-405-s003.pdf [file CEI-183-405-s003.pdf]

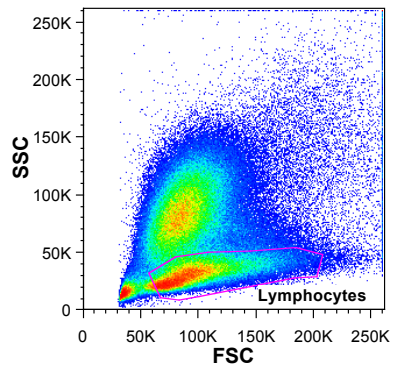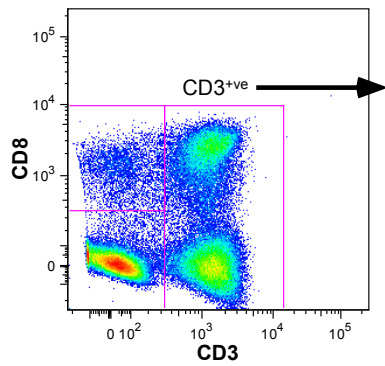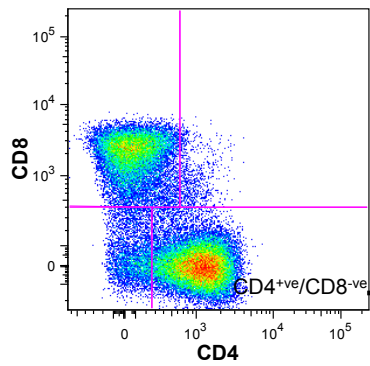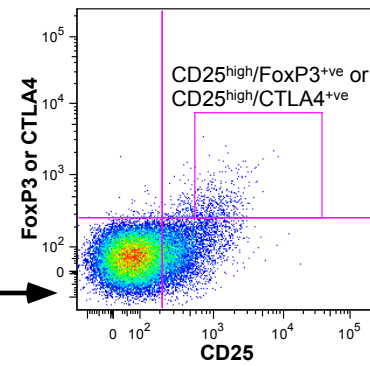

Supplement: CEI-183-405-s004.pdf [file CEI-183-405-s004.pdf]
